# Supplementary material
Source: Springer Nature journal article supplement (https://www.springermedizin.de/resource/supplementary/12889_2008_1265_MOESM2_ESM.pdf/9502816)
Supplement: MOESM2 [file 9502816]

|                                                         | Educational level |               |             |                  |    |               |               |             |                  |      | All women,<br>N=215 |                  |      |               |      |
|---------------------------------------------------------|-------------------|---------------|-------------|------------------|----|---------------|---------------|-------------|------------------|------|---------------------|------------------|------|---------------|------|
|                                                         | Low*, N=50        |               |             |                  |    | High**, N=165 |               |             |                  |      |                     |                  |      |               |      |
|                                                         | Yes               |               | No          |                  | DK | Yes           |               | No          |                  | DK   | Yes                 | No               |      | DK            |      |
| <b>Beliefs on ways of<br/>Transmission:</b>             | %                 | 95% CI        | %           | 95% CI           | %  | %             | 95% CI        | %           | 95% CI           | %    | %                   | 95% CI           | %    | 95% CI        | %    |
| Eating or drinking<br>from the same plates<br>and cups? | 24.0              | 12.2-<br>35.8 | 44.0        | 30.2-57.8        | 32 | 13.3          | 8.1-18.5      | 61.2        | 53.8-68.6        | 25.5 | 15.8                | 10.9-20.7        | 57.2 | 50.6-<br>63.8 | 27.0 |
| Shaking hands/<br>hugging/ living in<br>the same house? | 12.0              | 3.0-21.0      | <b>46.0</b> | <b>32.2-59.8</b> | 42 | 4.8           | 1.6-8.1       | <b>73.3</b> | <b>66.6-80.1</b> | 21.8 | 6.5                 | 3.2-9.8          | 67.0 | 60.7-<br>73.3 | 26.5 |
| Changing clothes<br>with someone who<br>has HIV/AIDS?   | 8.0               | 3.2-18.8      | <b>44.0</b> | <b>30.2-57.8</b> | 48 | 4.8           | 1.6-8.1       | <b>69.1</b> | <b>62.0-76.1</b> | 26.0 | 5.6                 | 2.5-8.6          | 63.3 | 56.8-<br>69.7 | 26.5 |
| Kissing?                                                | 22.0              | 10.5-<br>33.5 | 32.0        | 19.1-44.9        | 48 | 18.8          | 12.8-<br>24.7 | 48.5        | 40.9-56.1        | 32.7 | 19.5                | 14.2-24.8        | 44.7 | 38.0-<br>51.3 | 38.8 |
| Sexual intercourse<br>without condom?                   | 78.0              | 66.5-<br>89.5 | 4.0         | 1.1-13.5         | 66 | 92.7          | 88.8-96.7     | 1.2         | 0.3-4.3          | 6.1  | <b>89.3</b>         | <b>85.2-93.4</b> | 1.9  | 0.7-4.7       | 8.8  |
| Sexual intercourse<br>with condom?                      | 10.0              | 4.3-21.4      | <b>38.0</b> | <b>24.5-51.5</b> | 18 | 7.9           | 3.8-12.0      | <b>59.4</b> | <b>51.9-66.9</b> | 32.7 | 8.4                 | 4.7-12.1         | 54.4 | 47.8-<br>61.1 | 37.2 |

|                                                    |             |                  |      |           |    |             |                  |      |           |      |             |                  |      |           |      |
|----------------------------------------------------|-------------|------------------|------|-----------|----|-------------|------------------|------|-----------|------|-------------|------------------|------|-----------|------|
| Sharing needles while injecting drugs?             | <b>68.0</b> | <b>55.1-80.9</b> | 4.0  | 1.1-13.5  | 52 | <b>90.9</b> | <b>86.5-95.3</b> | 0.6  | 0.1-3.4   | 8.5  | <b>85.6</b> | <b>80.9-90.3</b> | 1.4  | 0.5-4.0   | 13.0 |
| Breastfeeding?                                     | 36.0        | 22.7-49.3        | 12.0 | 3.0-21.0  | 28 | 49.1        | 41.5-56.7        | 13.9 | 8.7-19.2  | 37.0 | 46.0        | 39.4-52.7        | 13.5 | 8.9-18.1  | 40.5 |
| From mother-to-child during pregnancy or delivery? | 54.0        | 40.2-67.8        | 2.0  | 0.4-10.5  | 52 | 72.7        | 65.9-79.5        | 3.6  | 0.8-6.5   | 23.6 | <b>68.4</b> | <b>62.2-74.6</b> | 3.3  | 0.9-5.6   | 23.7 |
| By mosquitos?                                      | 10          | 4.3-21.4         | 36   | 22.7-49.3 | 54 | 15.2        | 9.7-20.6         | 46.7 | 39.1-54.3 | 38.2 | 14.0        | 9.3-18.6         | 44.2 | 37.5-50.8 | 41.9 |
| By air-drop and air-dust?                          | 8.0         | 3.2-18.8         | 38.0 | 24.5-51.5 | 54 | 7.3         | 3.3-11.2         | 61.2 | 53.8-68.6 | 31.5 | 7.4         | 3.9-11.0         | 55.8 | 49.2-62.5 | 36.7 |

Additional file 2

Knowledge of HIV transmission routes according to educational level and total. Note that women answering no or no answer to if they have heard of HIV/AIDS were excluded. \* Never been to school/not finished or finished nine-year compulsory school, \*\*Special college/University/Institute/Academy, DK= don't know or no answer.
